# Supplementary material for: Modelling Multi-Species Connectivity at the Kafue-Zambezi Interface: Implications for Transboundary Carnivore Conservation
Source: MDPI journal article supplement (doi:10.3390/su132212886), 2021-11-21
Supplement: s1 [file s1]

Archive with 1 entries (1 files):
- sustainability-1441839-supplementary.pdf
