# Supplementary figures and images for: Modelling Multi-Species Connectivity at the Kafue-Zambezi Interface: Implications for Transboundary Carnivore Conservation
Source: MDPI journal article supplement (doi:10.3390/su132212886), 2021-11-21

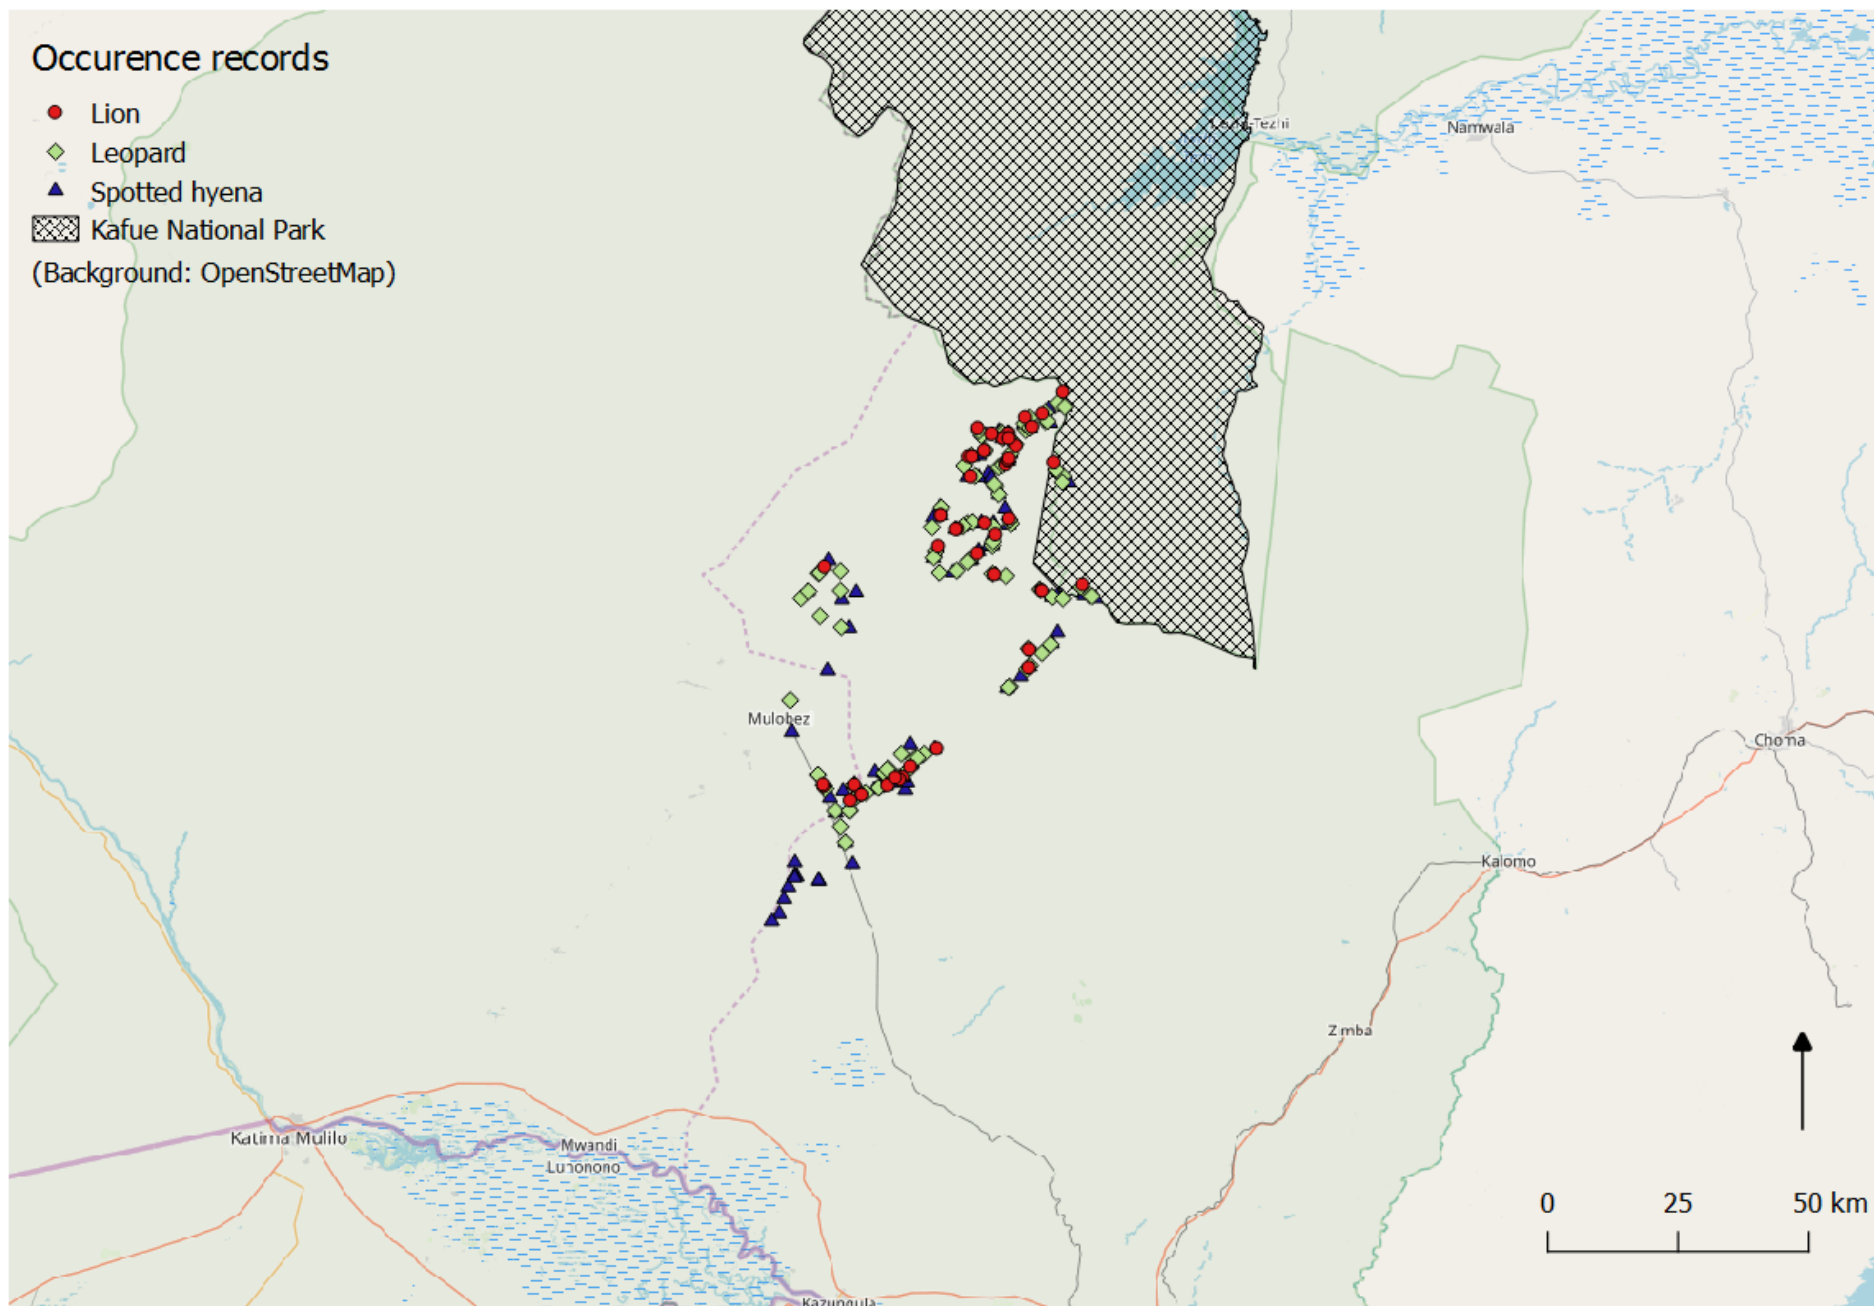

**Figure S1:** Species Occurrence Data.

Supplement: s1 [file s1 › sustainability-1441839-supplementary.pdf]
